# Supplementary material
Source: publisher figshare collection journal article supplement (https://frontiersin.figshare.com/ndownloader/files/12280088)
Supplement: Supplementary file [file 12280088]

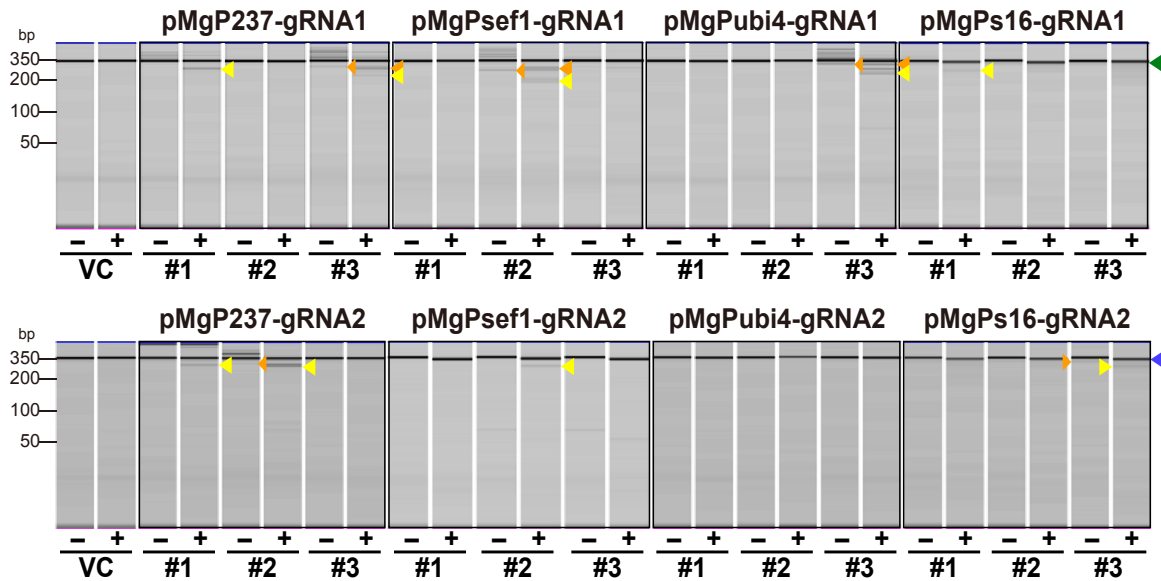

**Supplementary Fig. 1. Mutation analysis of *SINADK2A*-gRNA1 and *SINADK2A*-gRNA2 sites by Cel-1 assay.**

Mutation analysis was performed by the microchip electrophoresis using MultiNA to detect digested fragments higher sensitivity than agarose-gel electrophoresis. The gel image was obtained by MultiNA software based on peak charts shows detection of mutations by Cel-1 assay at the target site of each vectors. Green arrowheads indicate the untreated or non-mutation fragments (330 bp), and yellow arrowheads indicate the digested fragments (260 bp) by Cel-1 assay in *SINADK2A*-gRNA1 sites (upper panel). Blue arrowheads present the untreated or non-mutation fragments (340 bp), and yellow arrowheads indicate the digested fragments (260 bp) by Cel-1 assay in *SINADK2A*-gRNA2 sites (lower panel). **Orange arrowheads; deletion fragments.** –; untreated PCR products. +; treated with Cel-1 nuclease. VC; vector control tomato plants harboring the empty vector. The numbers indicate the tomato calli lines.
